# Supplementary material for: Polymorphisms of GLP-1 Receptor Gene and Response to GLP-1 Analogue in Patients with Poorly Controlled Type 2 Diabetes
Source: J Diabetes Res. 2015 Feb 15;2015:176949. doi: 10.1155/2015/176949 (PMC4345081; doi:10.1155/2015/176949)
Supplement: Supplementary file 1 — The promoter, all 13 exons and intron-exon boundaries of the GLP1R gene (GenBank accession number AL035690) were amplified by polymerase chain reaction (PCR) using specific primer sets in Supplementary Table 1. The Titanium Taq DNA Polymerase (Clontech Laboratories, Inc., Mountain View, CA, USA) was used in PCR. The PCR amplification conditions consisted of initial denaturation at 95°C for 5 minutes followed by 40 cycles at 95°C for 45 seconds, annealing temperature for 45 seconds and 72°C for 45 seconds, with one additional cycle at 72°C for 10 minutes. [file 176949.f1.zip]

Archive with 6 entries (6 files):
- Supplement _Table 1_Primer design.doc
- Supplement _Table 3_All _Gene variants.doc
- Supplement_ figure 1_SNP coverage.ppt
- Supplement_ figure 2_mean glucose.ppt
- Supplement_ figure 3_MAGE.ppt
- Supplement_Table 2_clinical variables.doc
